# Supplementary material for: Hydrogen capture by porphyrins at the TiO2(110) surface
Source: Royal Society of Chemistry journal article supplement (doi:10.1039/c5cp05437k), 2015-01-01
Supplement: c5cp05437k1.pdf [file c5cp05437k1.pdf]

## Hydrogen capture by porphyrins at the TiO<sub>2</sub>(110) surface

Giacomo Lovat,<sup>a,b</sup> Daniel Forrer,<sup>c</sup> Mikel Abadia,<sup>d</sup> Marcos Dominguez,<sup>a,b</sup> Maurizio Casarin,<sup>e</sup> Celia Rogero,<sup>d</sup> Andrea Vittadini<sup>\*e</sup> and Luca Floreano<sup>\*a</sup>  
SUPPORTING INFORMATION

### 1 NEXAFS C and N K-edge.

The NEXAFS spectra in TM polarization for the monolayer phase of porphyrins on TiO<sub>2</sub>(110) are dominated by the resonances of the  $\pi$ -symmetry unoccupied MOs, due to the closely planar molecular orientation. This geometry is preserved also in the next few molecular layers before a 3D growth takes place. The carbon spectra in TM polarization are characterized by two main peaks (see Fig. 1). For all of the three molecules, the first resonance at  $\sim 284.1$  eV corresponds to the resonance of the lowest unoccupied molecular orbital (LUMO), which is localized on the pyrrolic carbon atoms. This resonance displays a large dichroism with a residual intensity in TE polarization of  $\sim 10\%$ , that can be ascribed either to a minority of second layer molecules and defects or to a small out of plane distortion of the tetra-pyrrolic macrocycle due to the hydrogen uptake. Overall, we can conclude that three porphyrin molecules display the same planar orientation of the inner macrocycle, irrespective of their different peripheral terminations.

The second resonance at  $\sim 285.2$  eV is mostly contributed by the molecular orbital localized on the phenyl carbon atoms in the case of TPP and TBTPP, while it stems from the LUMO+1 of the pyrrolic rings in the case of OEP (with a much lower intensity and slightly different energy). While the latter pyrrolic LUMO+1 resonances displays a dichroism simply following that of its LUMO counterpart, the NEXAFS resonances associated with phenyls display a smaller dichroism, indicating that they are tilted off the surface (of  $25\text{--}30^\circ$  and  $40^\circ$  for TBTPP and TPP, respectively). This tilt angle confirms that both TPP and TBTPP preserve their 3D structure, although slightly relaxed with respect to their bulk phase.

The nitrogen K-edge NEXAFS spectra, shown in Fig. 2 display a strong similarity among the different porphyrins with a char-

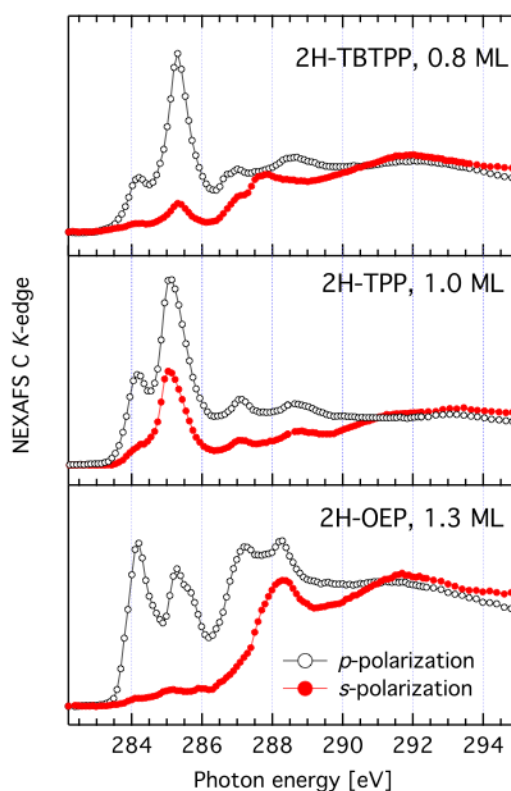

**Fig. 1** Carbon K-edge NEXAFS spectra measured in TM and TE polarization (open and filled markers, respectively) for metal-free porphyrin films grown on TiO<sub>2</sub>(110) at room temperature in the monolayer coverage range.

<sup>a</sup> CNR-IOM, Laboratorio TASC, Basovizza SS-14, Km 163.5, I-34149 Trieste, Italy.

<sup>b</sup> Graduate School of Nanotechnology, University of Trieste, P.zza Europa 1, I-34127 Trieste, Italy.

<sup>c</sup> CNR-IEI and INSTM, via Marzolo 1, I-35131 Padova, Italy.

<sup>d</sup> Materials Physics Center MPC, Centro de Física de Materiales (CSIC-UPV/EHU) and Donostia International Physics Center (DIPC), E-20018 San Sebastian, Spain.

<sup>e</sup> Dipartimento di Scienze Chimiche, Università di Padova, via Marzolo 1, I-35131 Padova, Italy.

<sup>\*</sup> Corresponding authors: andrea.vittadini@unipd.it, floreano@iom.cnr.it

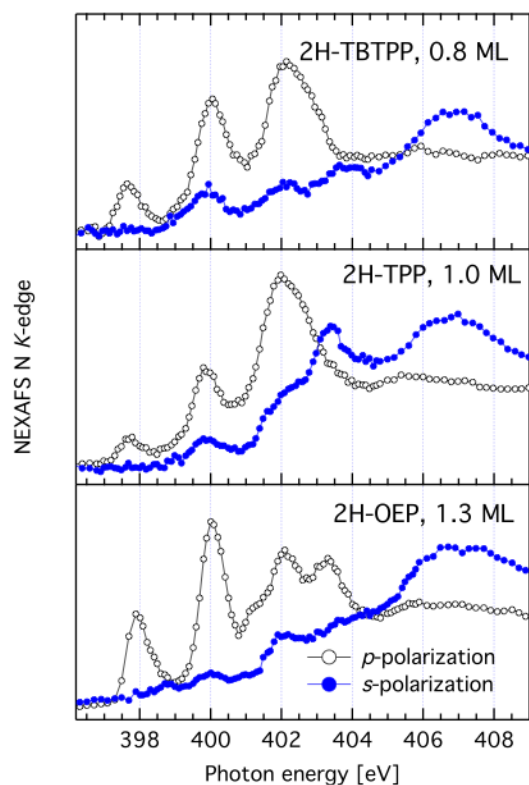

**Fig. 2** Nitrogen *K*-edge NEXAFS spectra measured in TM and TE polarization (open and filled markers, respectively) on the same films of previous Figure.

acteristic sequence of resonances at  $\sim 398$ , 400 and 402 eV. The first two peaks correspond to the  $\pi$ -symmetry unoccupied MOs localized on the iminic (LUMO at 397.7-398.0 eV) and pyrrolic nitrogen (LUMO+1 at  $\sim 400$  eV). For all the three molecules, the residual intensity recorded at the iminic LUMO resonance can be associated with the residual iminic intensity observed in the corresponding photoemission spectra (see Fig. 1 in the article and following XPS analysis). It is worth recalling that, at variance with XPS, the intensity of the NEXAFS resonances is not simply reflecting the compound stoichiometry. The residual iminic component (corresponding to the minority phase of unreacted molecules) displays a dichroism larger than that of the LUMO+1 resonance (corresponding to the majority phase of hydrogen-reacted molecules), indicating that the rings associated with the pyrrolic nitrogen are tilted off the surface by an angle larger than that of the rings associated with iminic nitrogen. This observation is in qualitative agreement with DFT calculations showing an increase of the average tilt angle of the macrocycle rings upon hydrogen uptake.

## 2 N 1s core level photoemission

### 2.1 Coverage dependence

In Fig. 3, we show that the spectroscopic footprint of a fully hydrogenated macrocycle is observed from the early stage of deposition in the submonolayer range (spectrum taken at 0.4 ML).

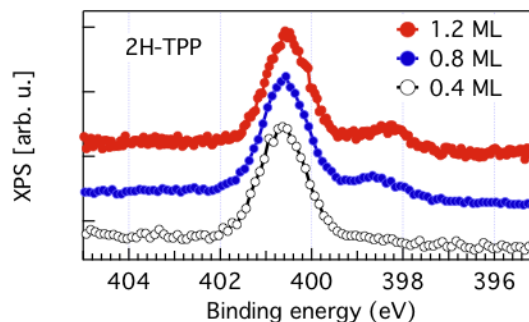

**Fig. 3** Photoemission spectra of 2H-TPP measured at 0.4, 0.8 and 1.2 ML coverage with a photon energy  $h\nu = 500$  eV. Molecules have been deposited at room temperature on a clean  $\text{TiO}_2(110)$  surface.

A contribution from a minority of unreacted molecules starts to appear close to the completion of the first layer (spectrum taken at 0.8 ML), as witnessed by the appearance of the iminic peak at 398.5 eV. The whole spectrum starts to shift to lower binding energy, when the coverage exceeds the first monolayer (see spectrum at 1.2 ML) due to the increasing weight of second layer molecules. The same behavior is observed also for 2H-OEP and 2H-TBTPP.

### 2.2 XPS analysis

The N 1s photoemission peaks have been fitted to true Voigt function with a Shirley background. The fitting analysis is shown in Fig. 4 for the case of 2H-TPP molecules at the coverage of 5.5 and 0.8 ML. The overall FWHM of the pyrrolic peak is found to be 0.69 and 1.05 eV at 5.5 and 0.8 ML, respectively.

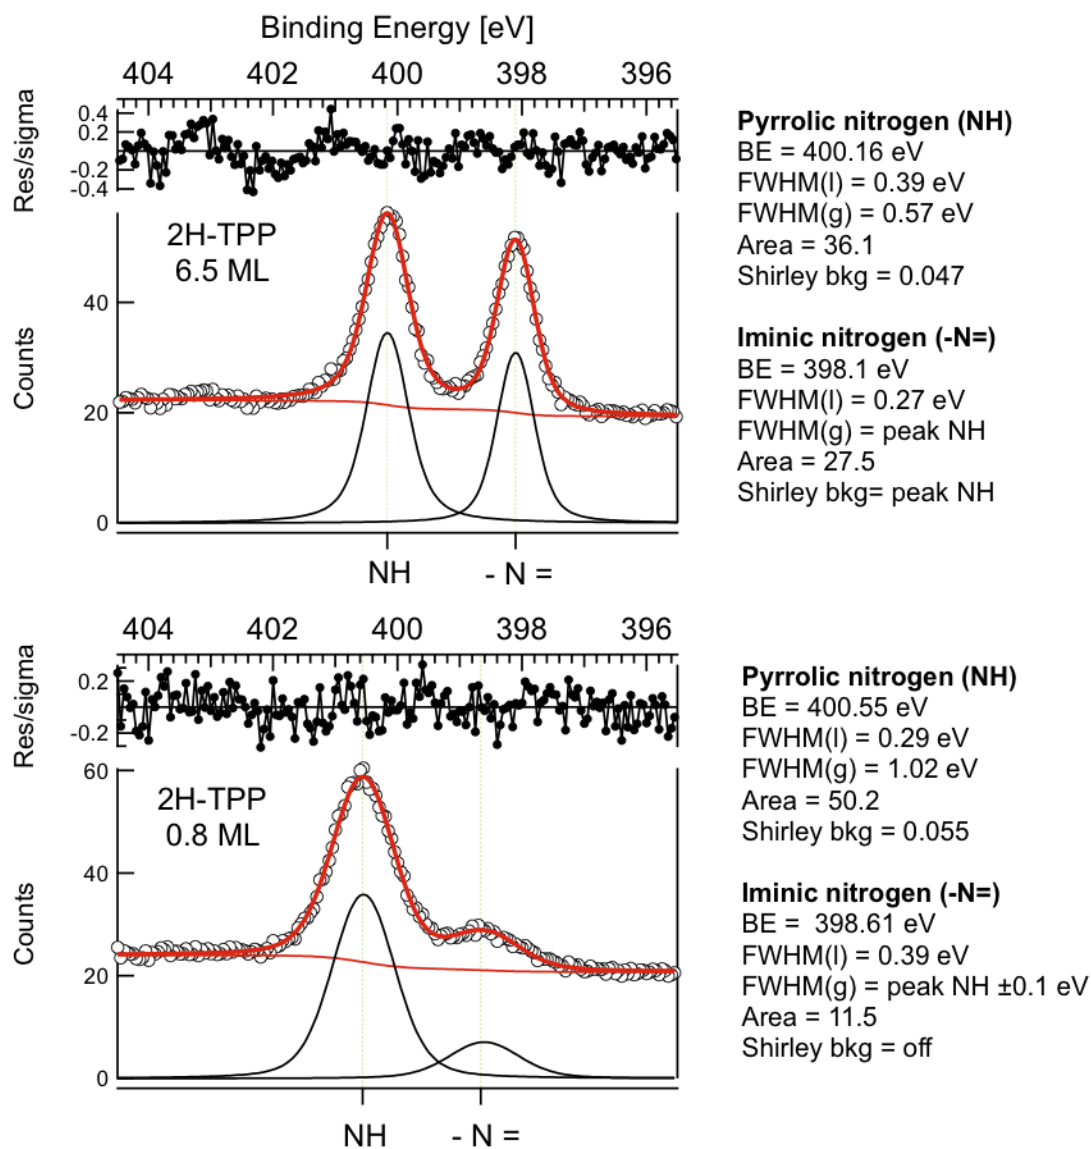

**Fig. 4** Photoemission spectra of 2H-TTP at 6.5 (top) and 0.8 ML (bottom). The experimental data (open markers) are taken from Fig. 1 of the article (measured at  $h\nu = 500$  eV with  $\Delta E \sim 160$  meV). Fitting curves are shown as full lines and resolved in single peaks. The corresponding fitting analysis is reported on the right side.
